# Supplementary material for: Testing Efficacy of Assembly-Free and Alignment-Free Methods for Species Identification Using Genome Skims, with Patellogastropoda as a Test Case
Source: MDPI journal article supplement (doi:10.3390/genes13071192), 2022-07-02
Supplement: s1 [file s1]

**Table S1.** The original paired-end reads.

| Species                   | Uncompressed file/kb  |
|---------------------------|-----------------------|
| <i>L. cassis</i>          | 10,091,509/10,091,509 |
| <i>N. radula</i>          | 7,467,310/7,467,310   |
| <i>C. grata</i>           | 8,553,973/8,553,973   |
| <i>L. goshimai</i>        | 7,454,544/7,454,544   |
| <i>P. conulus</i>         | 14,760,357/14,760,357 |
| <i>P. saccharina lanx</i> | 14,461,217/14,461,217 |
| <i>P. ryukyuensis</i>     | 16,165,902/16,165,902 |
| <i>C. nigrolineata</i>    | 12,972,845/12,972,845 |
| <i>C. toreuma</i> (GD)    | 14,172,310/14,172,310 |
| <i>C. toreuma</i> (HN)    | 18,663,524/18,663,524 |
| <i>S. flexuosa</i>        | 12,406,821/12,406,821 |

**Table S2.** The parameters of different size of genome skims calculated by Skmer.

0.1G

|                           | Coverage | Genome_length | Error_rate | Read_length |
|---------------------------|----------|---------------|------------|-------------|
| <i>S. flexuosa</i>        | NA       | NA            | NA         | 229         |
| <i>L. cassis</i>          | NA       | NA            | NA         | 235         |
| <i>N. radula</i>          | NA       | NA            | NA         | 234         |
| <i>C. grata</i>           | NA       | NA            | NA         | 238         |
| <i>L. goshimai</i>        | NA       | NA            | NA         | 234         |
| <i>P. conulus</i>         | NA       | NA            | NA         | 233         |
| <i>P. saccharina lanx</i> | NA       | NA            | NA         | 232         |
| <i>P. ryukyuensis</i>     | NA       | NA            | NA         | 234         |
| <i>C. nigrolineata</i>    | NA       | NA            | NA         | 243         |
| <i>C. toreuma</i> (GD)    | NA       | NA            | NA         | 237         |
| <i>C. toreuma</i> (HN)    | NA       | NA            | NA         | 234         |

0.5G

---

|                           | Coverage           | Genome_length | Error_rate           | Read_length |
|---------------------------|--------------------|---------------|----------------------|-------------|
| <i>S. flexuosa</i>        | 1.5013287792624153 | 95750346      | 0.028200929350726822 | 229         |
| <i>L. cassis</i>          | 1.3327740387547855 | 45463855      | 0.027914606109592177 | 234         |
| <i>N. radula</i>          | 0.9152781068328262 | 110192677     | 0.01567515129507513  | 234         |
| <i>C. grata</i>           | 0.5036046394650663 | 174661355     | 0.008291417727817385 | 238         |
| <i>L. goshimai</i>        | 1.6776567653334804 | 49808401      | 0.028761549753830717 | 234         |
| <i>P. conulus</i>         | 1.314254793107782  | 102469388     | 0.02150057228294544  | 233         |
| <i>P. saccharina lanx</i> | 0.9278481344981513 | 119876574     | 0.01775294465663002  | 232         |
| <i>P. ryukyuensis</i>     | 1.3659537009334826 | 75619675      | 0.02491465125299086  | 234         |
| <i>C. nigrolineata</i>    | 0.5179819107059459 | 148918377     | 0.010116997073165712 | 243         |
| <i>C. toreuma</i> (GD)    | 0.7217787063366554 | 144208905     | 0.013825683369604325 | 237         |
| <i>C. toreuma</i> (HN)    | 0.7051828916055268 | 144004463     | 0.01409483746843987  | 234         |

---

1G

|                           | Coverage           | Genome_length | Error_rate            | Read_length |
|---------------------------|--------------------|---------------|-----------------------|-------------|
| <i>S. flexuosa</i>        | 1.0029473619968219 | 280995598     | 0.016122217186681498  | 229         |
| <i>L. cassis</i>          | 0.9050214990722926 | 129731681     | 0.015727142054512533  | 234         |
| <i>N. radula</i>          | 0.8636988451143478 | 226908173     | 0.007429620144492     | 234         |
| <i>C. grata</i>           | 0.6852204637580797 | 251596063     | 0.0037109939709843998 | 238         |
| <i>L. goshimai</i>        | 1.1259212744418114 | 143346414     | 0.017574206420095217  | 234         |
| <i>P. conulus</i>         | 1.0438850315377552 | 253264561     | 0.012019595240989833  | 233         |
| <i>P. saccharina lanx</i> | 0.8560015672871802 | 253444900     | 0.008890363121627054  | 232         |
| <i>P. ryukyuensis</i>     | 1.0079677742963102 | 200437899     | 0.014262985885386215  | 234         |
| <i>C. nigrolineata</i>    | 0.6892807532643411 | 220849531     | 0.005215118095972748  | 243         |
| <i>C. toreuma</i> (GD)    | 0.7659604249090144 | 268961901     | 0.006168678299533492  | 237         |
| <i>C. toreuma</i> (HN)    | 0.758536873487782  | 264678395     | 0.006597347393543118  | 234         |

|                           | Coverage           | Genome_length | Error_rate            | Read_length |
|---------------------------|--------------------|---------------|-----------------------|-------------|
| <i>S. flexuosa</i>        | 0.9739603350231031 | 568184167     | 0.008350984478455836  | 229         |
| <i>L. cassis</i>          | 0.8836878220845178 | 254302203     | 0.007915517638578007  | 234         |
| <i>N. radula</i>          | 1.1234930557432787 | 333400647     | 0.0033993059939037007 | 234         |
| <i>C. grata</i>           | 1.1398227918679955 | 291051615     | 0.0021502725881005214 | 238         |
| <i>L. goshimai</i>        | 1.0073525901651545 | 308002573     | 0.009496062842218045  | 234         |
| <i>P. conulus</i>         | 1.1328283557791097 | 460810310     | 0.006000928817245121  | 233         |
| <i>P. saccharina lanx</i> | 1.1087942016526018 | 382399050     | 0.00439628172456763   | 232         |
| <i>P. ryukyuensis</i>     | 1.012443020367157  | 393579569     | 0.00699520386915653   | 234         |
| <i>C. nigrolineata</i>    | 1.105576596622458  | 272373415     | 0.0029954150060985674 | 243         |
| <i>C. toreuma</i> (GD)    | 1.149406241031329  | 355042049     | 0.0032381573580544387 | 237         |
| <i>C. toreuma</i> (HN)    | 1.1362944576862781 | 350783337     | 0.0035828860869960844 | 234         |

4G

|                           | Coverage           | Genome_length | Error_rate            | Read_length |
|---------------------------|--------------------|---------------|-----------------------|-------------|
| <i>S. flexuosa</i>        | 1.255199716467791  | 843502458     | 0.004405105731694392  | 229         |
| <i>L. cassis</i>          | 0.8546704594611217 | 205411753     | 0.010290676984266778  | 234         |
| <i>N. radula</i>          | 1.7091781542083455 | 400260113     | 0.001975268301126487  | 234         |
| <i>C. grata</i>           | 1.9215991714931617 | 316407172     | 0.0015958020516907423 | 238         |
| <i>L. goshimai</i>        | 1.1533818579078017 | 489368197     | 0.004877242961904393  | 233         |
| <i>P. conulus</i>         | 1.5924890918985637 | 630852603     | 0.00342944974093351   | 233         |
| <i>P. saccharina lanx</i> | 1.7314412846506766 | 467909490     | 0.0027453164655780737 | 232         |
| <i>P. ryukyuensis</i>     | 1.353249417848962  | 566191664     | 0.003609606512741781  | 233         |
| <i>C. nigrolineata</i>    | 1.8734610083546972 | 309937954     | 0.002118300972162257  | 243         |
| <i>C. toreuma</i> (GD)    | 1.8795930711427973 | 419087036     | 0.0020809347574954895 | 237         |
| <i>C. toreuma</i> (HN)    | 1.845035501662378  | 417354301     | 0.0023113595691213185 | 234         |

largest data

|                           | Coverage           | Genome_length | Error_rate            | Read_length |
|---------------------------|--------------------|---------------|-----------------------|-------------|
| <i>S. flexuosa</i>        | 1.728193678897708  | 1019697975    | 0.0030005034435302003 | 229         |
| <i>L. cassis</i>          | 1.4576399556336794 | 437398847     | 0.002521865597942541  | 234         |
| <i>N. radula</i>          | 2.394840588569781  | 446504425     | 0.0015236807962926147 | 234         |
| <i>C. grata</i>           | 2.7773452574667132 | 340994281     | 0.0014036933986266709 | 238         |
| <i>L. goshimai</i>        | 1.4395252523196236 | 605976119     | 0.00313680064894728   | 233         |
| <i>P. conulus</i>         | 2.2315570578672017 | 753834277     | 0.00257679334746419   | 233         |
| <i>P. saccharina lanx</i> | 2.5478325003695264 | 528630228     | 0.0022658388657428308 | 232         |
| <i>P. ryukyuensis</i>     | 1.8917555040703409 | 677175949     | 0.002434969677229337  | 233         |
| <i>C. nigrolineata</i>    | 2.7512881584743245 | 352478197     | 0.0017901738425651903 | 243         |
| <i>C. toreuma</i> (GD)    | 2.709253588460741  | 486739748     | 0.0016482778811850451 | 237         |
| <i>C. toreuma</i> (HN)    | 2.6691480178728657 | 484473177     | 0.0018889276975615488 | 234         |

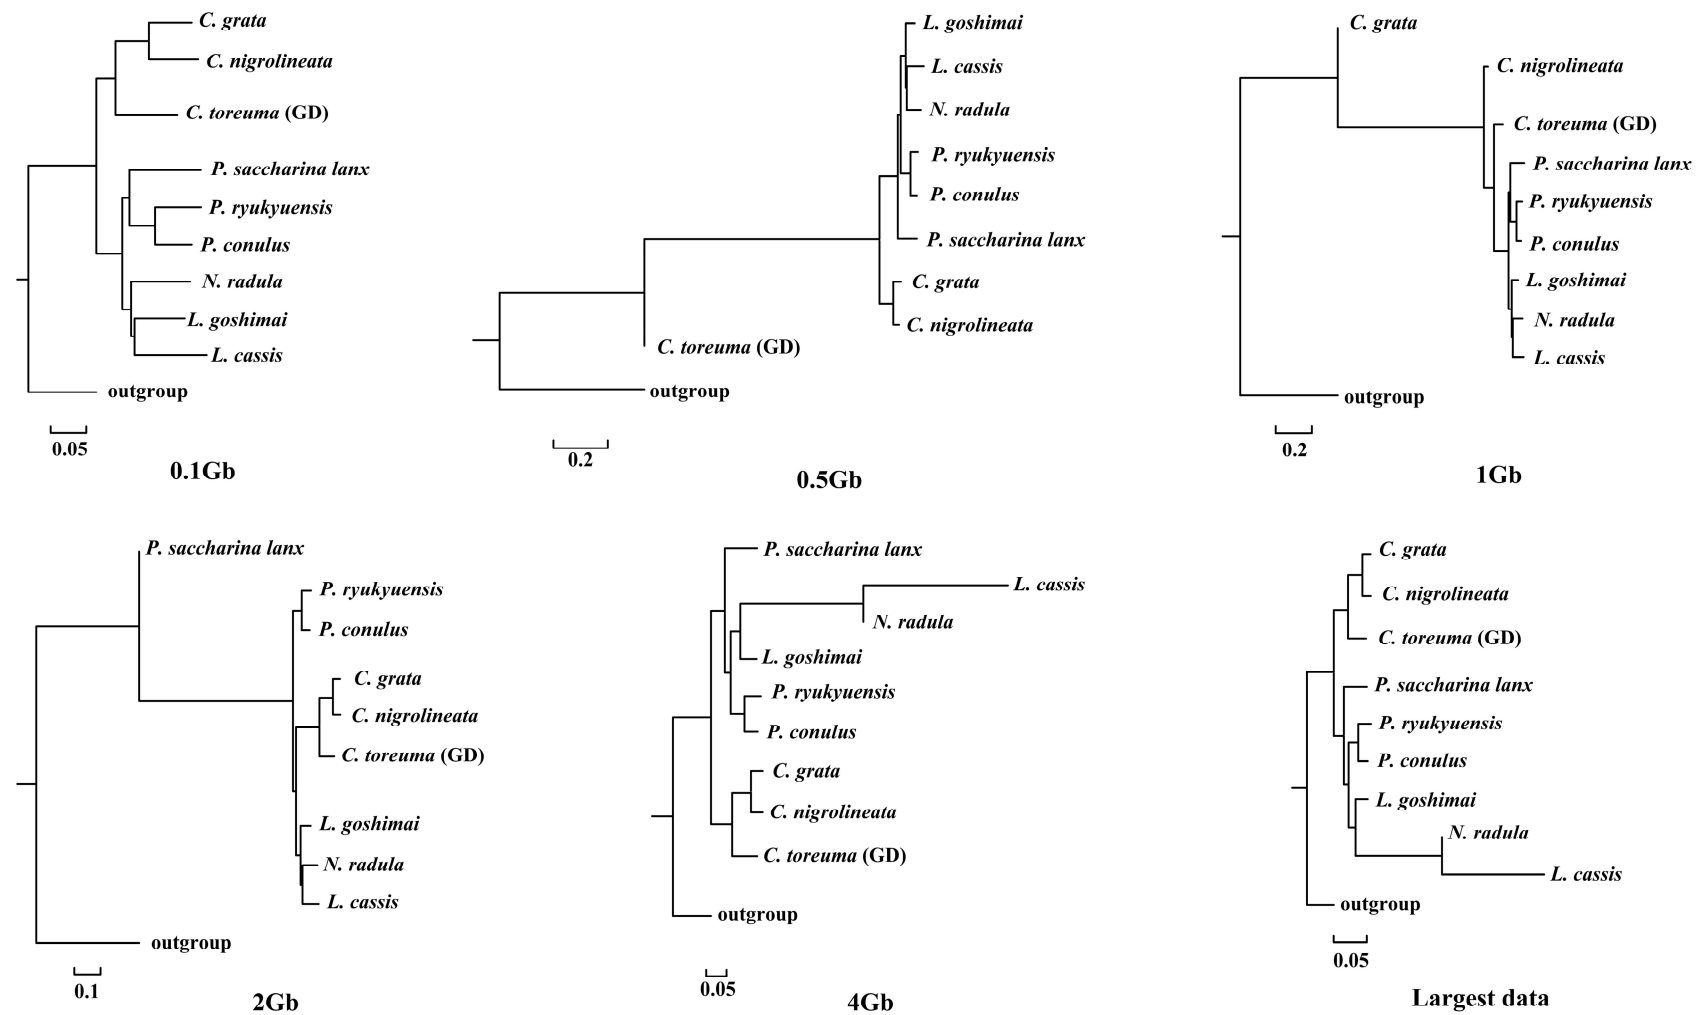

**Figure S1.** The backbone tree of *C. toreuma* (HN) and *S. flexuosa* inferred by FastME under different size of genome skims.



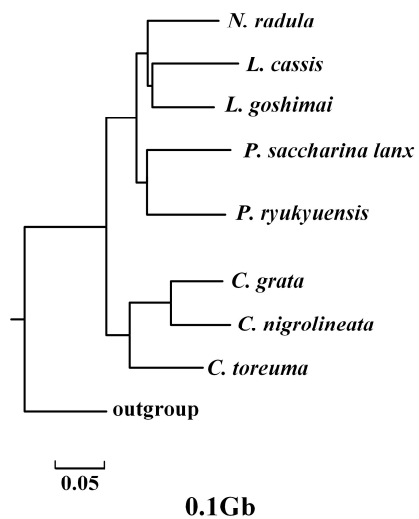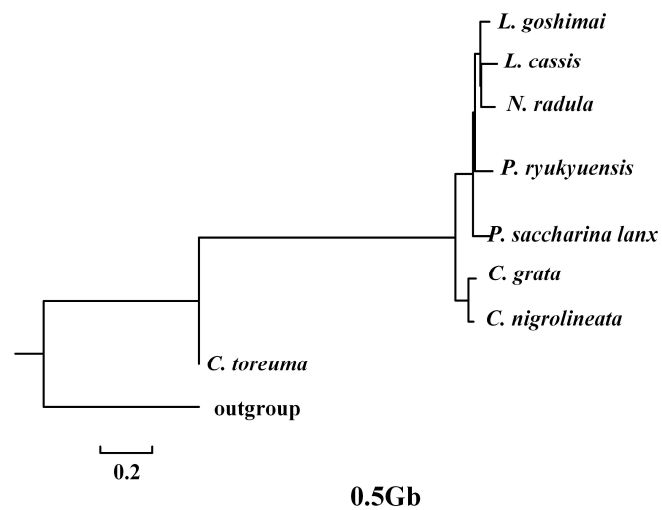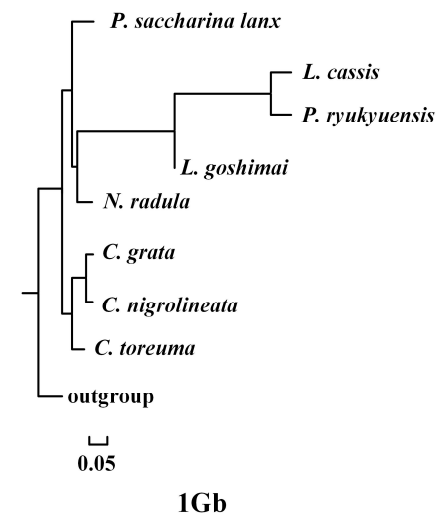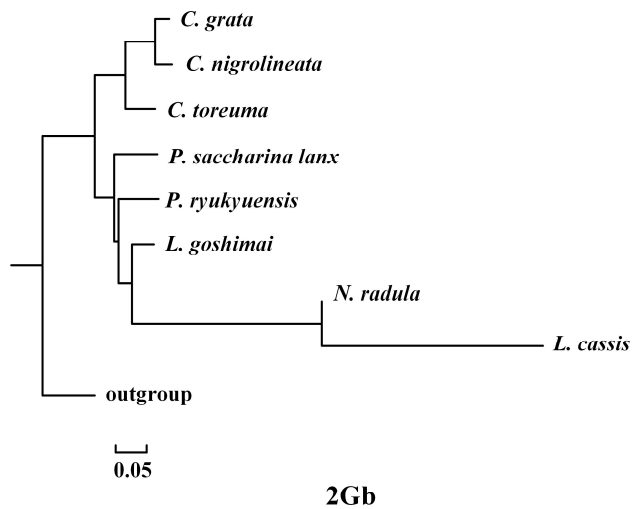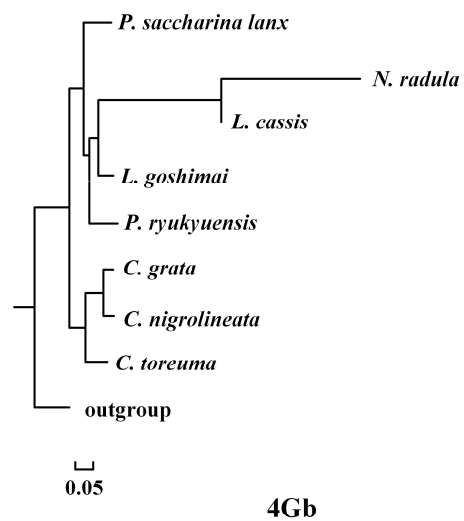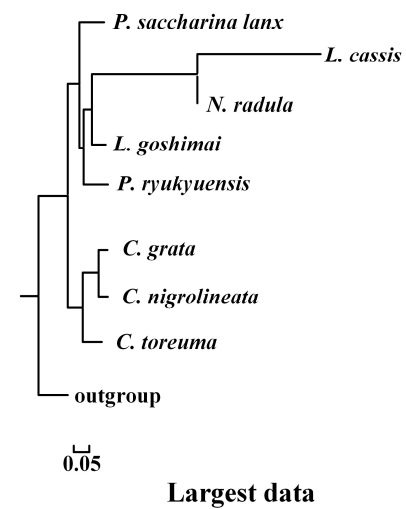

**Figure S2.** The backbone tree of *P. conulus* inferred by FastME under different size of genome skims.

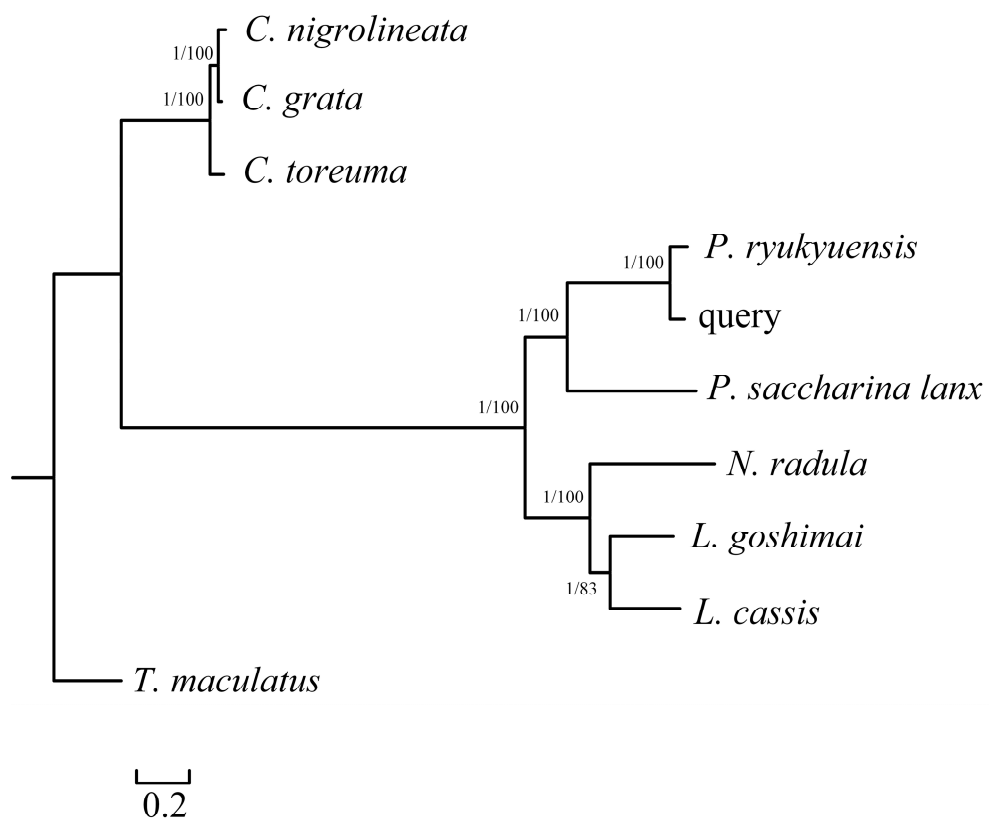

**Figure S3.** Phylogenetic relationships of *P. conulus* (query species) inferred based on concatenated amino acids of 13 mitochondrial protein-coding genes. Numbers at nodes are statistical support values for BI (posterior probabilities)/ML (bootstrap proportions in percentage).

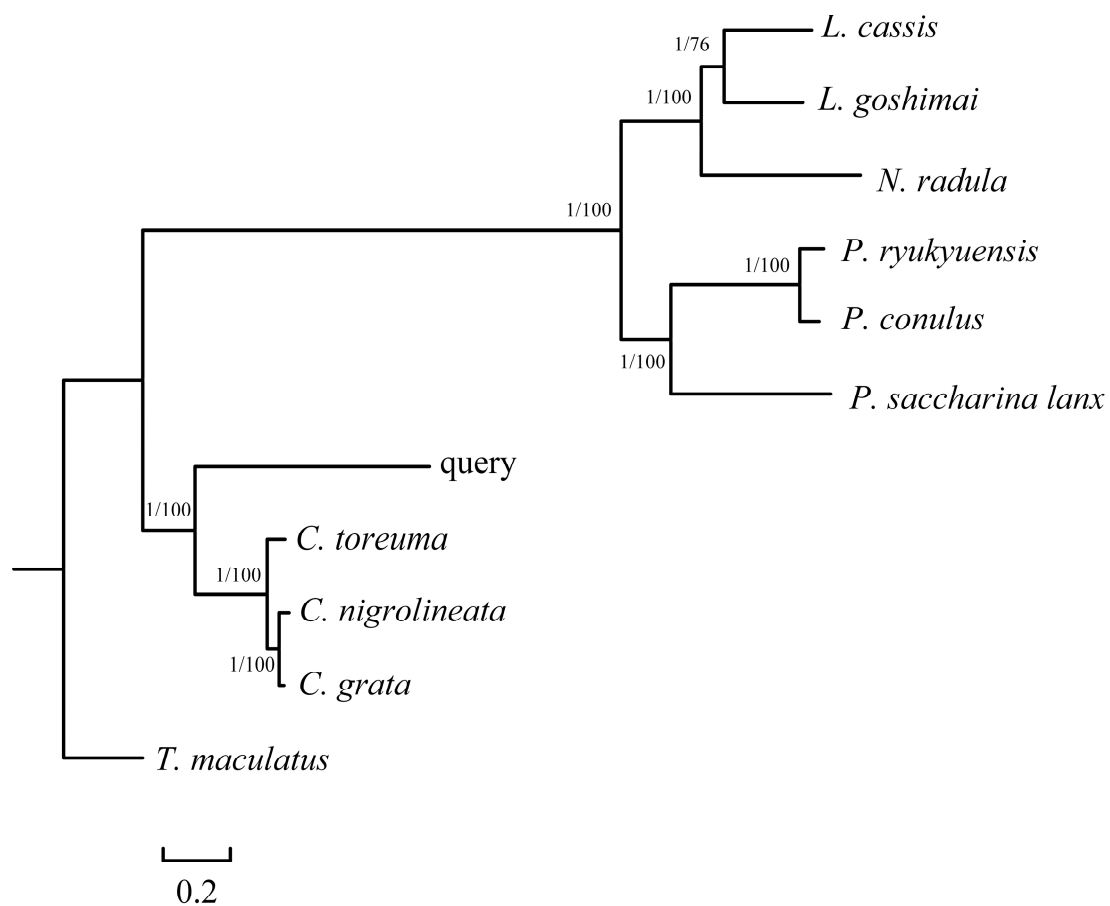

**Figure S4.** Phylogenetic relationships of *S. flexuosa* (query species) inferred based on concatenated amino acids of 13 mitochondrial protein-coding genes. Numbers at nodes are statistical support values for BI (posterior probabilities)/ML (bootstrap proportions in percentage).
